# Supplementary material for: Evaluation of DNA methyltransferase activity and inhibition via chiroplasmonic assemblies of gold nanoparticles
Source: Royal Society of Chemistry journal article supplement (doi:10.1039/c5cc05375g), 2015-01-01
Supplement: c5cc05375g1.pdf [file c5cc05375g1.pdf]

**Supporting Information**

**Evaluation of DNA Methyltransferase Activity and Inhibition via  
Chiroplasmonic Assembled Gold Nanoparticles**

Yuanjian Liu<sup>a</sup>, Min Wei<sup>b</sup>, Linqun Zhang<sup>a</sup>, Wei Wei<sup>a\*</sup>, Yuanjian Zhang<sup>a</sup>, Songqin Liu<sup>a</sup>

<sup>a</sup>*Jiangsu Province Hi-Tech Key Laboratory for Bio-medical Research, School of  
Chemistry and Chemical Engineering, Southeast University, Nanjing, 211189, P.R.  
China*

<sup>b</sup>*College of Food Science and Technology, Henan University of Technology,  
Zhengzhou, 450001, P.R. China*

\*Corresponding author. Tel.: 86-25-52090613; Fax: 86-25-52090618.

E-mail address: wei\_wei98@163.com (W. Wei)

## 1 1. Experimental Section.

2     **Chemicals and Reagents.** Chloroauric acid tetrahydrate ( $\text{HAuCl}_4 \cdot 4\text{H}_2\text{O}$ ) and sodium citrate  
3 were purchased from Shanghai Reagent Company (Shanghai, China). Thiolated, methyl  
4 terminated ethylene glycol oligomers (thiol-PEG<sub>6</sub>-methyl), bis(*p*-  
5 sulfonatophenyl)phenylphosphine dihydrate dipotassium salt (BSPP), 5-Aza-*z'*-deoxycytidine (5-  
6 Aza), and procaine were purchased from Sigma-Aldrich Co. Ltd. (St. Louis, MO). S-  
7 adenosylmethionine (SAM), *E. coli* CpG methyltransferase (M.SssI), *E. coli* restriction  
8 endonuclease (*Hpa*II), and DNA adenine methylation (Dam) MTase were obtained from New  
9 England BioLabs (Ipswich, MA). All other reagents of certified analytical grade were purchased  
10 from Sunshine biotechnology (Nanjing, China).

11     All DNA oligonucleotides purified by polyacrylamide gel electrophoresis (PAGE) were  
12 supplied by Shanghai Sangon Biological Engineering Technology & Services Co. Ltd. (Shanghai,  
13 China) and suspended in deionized (DI) water (18.2 MΩ cm, Barnstead, Thermo Scientific, USA)  
14 to a final concentration of 1 μM. The DNA sequences are shown in Table S1.

15     The buffer solutions employed in this study were as follows: DNA hybridization buffer was  
16 33 mM Tris-acetate (Tris-Ac) buffer solution (pH 7.4) containing 66 mM NaAc and 10 mM  
17 Mg(Ac)<sub>2</sub>; The MTase work buffer was 10 mM Tris-HCl (pH 7.9) containing 50 mM NaCl, 10 mM  
18 MgCl<sub>2</sub>, 160 μM SAM, and 1 mM DTT; The cleavage buffer was 33 mM Tris-Ac (pH 7.9)  
19 containing 10 mM Mg(Ac)<sub>2</sub>, 66 mM KAc, and 0.1 mg/mL bovine serum albumin (BSA). All  
20 aqueous solutions were prepared with DI water.

21     **Apparatus.** UV-vis spectra were obtained from an UV-vis spectrophotometer (Shimadzu  
22 UV-2450, Kyoto, Japan) at wavelengths ranging from 200 to 800 nm. Transmission electron  
23 microscopy (TEM) images were collected on a transmission electron microscope (JEM-2010,  
24 Hitachi, Japan) operating at an acceleration voltage of 200 kV. Before TEM examination, 10 μL  
25 of each sample was first dispersed onto a copper grid coated with the carbon film, and was then  
26 dried in air. The hydrodynamic diameters of NPs and dimers were measured using dynamic light  
27 scattering (DLS; Zetasizer Nano ZS90, Malvern, UK). A quartz cuvette QS 10 mm was used as a  
28 sample container. The chirality of AuNPs dimers was characterized by circular dichroism (CD;  
29 Chirascan, Applied Photophysics, UK). 100 μL samples were added to quartz cuvettes with a 1  
30 mm width. The temperature is kept to be 25 °C for all the measurements.

31     **Preparation of Monoconjugated DNA-AuNPs.** AuNPs with diameters of 15 ± 2 nm (Au<sub>1</sub>),  
32 20 nm ± 2 nm (Au<sub>2</sub>), and 25 ± 3 nm (Au<sub>3</sub>) were synthesized according to the classic citrate  
33 reduction method developed by Frens.<sup>1</sup> The size of the particles was controlled by varying  
34 [Au(III)]/[citrate] ratio. First, all glasswares used in experiment were thoroughly washed with  
35 aqua regia (HCl/HNO<sub>3</sub>, volume ratio 3:1), rinsed in DI water, and oven-dried prior to use. Second,  
36 an aqueous solution of  $\text{HAuCl}_4 \cdot 4\text{H}_2\text{O}$  (0.25 mM, 50 mL) was brought to reflux at continuous  
37 stirring. Third, sodium citrate solution (1.0, 0.875, or 0.750 mL, 1% by weight, freshly prepared)  
38 was quickly added, stirred, and kept boiling for another 30 mins. The solution color changed from

1 yellow to clear, to black, to purple and finally to wine red during this period. Then the heating  
2 source was removed, the suspension was stirred for another 30 mins, allowed to cool to room  
3 temperature, and subsequently filtered through a 0.45  $\mu\text{m}$  acetate filter (Micron Separations Inc.).  
4 Finally, the AuNPs solution was stored in deep color bottles at 4  $^{\circ}\text{C}$  for further use. Concentration  
5 of the as-prepared AuNPs was determined using UV-vis spectroscopy.<sup>2</sup>

6 Prebound citrate ligands on the surface of AuNPs were replaced by BSPP ligands,<sup>3</sup> in order  
7 to increase the negative surface charge of the particle and consequently ensure that the AuNPs  
8 modified with less DNA were well-dispersed at high ionic strength. In brief, excess BSPP (40 mg  
9 for Au<sub>1</sub>, 20 mg for Au<sub>2</sub>, and 10 mg for Au<sub>3</sub>) were added to 10 mL aqueous solutions of AuNPs  
10 (Au<sub>1</sub>, Au<sub>2</sub>, and Au<sub>3</sub> at initial concentrations of 8, 4, and 2 nM). The mixtures were incubated  
11 overnight at room temperature, centrifuged at different speeds (12000, 10000, and 7000 rpm) for  
12 20 mins to collect the precipitated AuNPs. After rinsed thoroughly with DI water, the pellets were  
13 redispersed in 200  $\mu\text{L}$  DI water. The monoconjugated DNA-AuNPs (ssDNA-AuNPs) were  
14 prepared following a literature procedure,<sup>3,4</sup> with some modifications. 20  $\mu\text{L}$  of BSPP-protected  
15 AuNPs were mixed with single-strand DNA at a molar ratio of 1:3 for DNA-Au<sub>1</sub>, 1:5 for DNA-  
16 Au<sub>2</sub> and DNA-Au<sub>3</sub>, respectively, followed by rocking gently at room temperature for 24 hours.  
17 The added BSPP was used as a reducing agent to minimize oxidation of the thiol moieties.<sup>5</sup> The  
18 prepared DNA-AuNPs were further incubated with thiol-PEG<sub>6</sub>-methyl (at the concentration ratio  
19 of 1:50 000) for 2 h to passivate the AuNPs surface.<sup>5,6</sup> The sample was then centrifuged to  
20 remove uncoupled oligonucleotides. The pellet was redispersed in 50  $\mu\text{L}$  DNA hybridization  
21 buffer, and stored at 4  $^{\circ}\text{C}$ .

22 **Chiroplasmonic Assemblies of AuNPs dimers.** Various concentrations of linker DNA<sub>2</sub> was  
23 added into the solution consisting of 25  $\mu\text{L}$  of 0.08  $\mu\text{M}$  DNA<sub>3</sub>-Au<sub>2</sub>, 50  $\mu\text{L}$  of 0.04  $\mu\text{M}$  DNA<sub>4</sub>-Au<sub>3</sub>,  
24 and 115  $\mu\text{L}$  DNA hybridization buffer (a molar ratio of 1:1 for DNA<sub>3</sub>-Au<sub>2</sub> and DNA<sub>4</sub>-Au<sub>3</sub>).  
25 Hybridization mixtures were heated at 90  $^{\circ}\text{C}$  for 5 mins to minimize nonspecific hybridization,  
26 and then incubated on an orbital shaker at room temperature for 12 hours. Finally, the mixtures  
27 were incubated on a thermostatic container at 25  $^{\circ}\text{C}$  for 30 mins before CD measurements.

28 **M.SssI MTase Activity Assay.** The methylation of AuNPs dimers were performed at 37  $^{\circ}\text{C}$   
29 for 3 hours in the MTase working buffer with various concentration of M.SssI ranging from 0 to  
30 400 U/mL. After centrifugation, the supernatant containing unreacted M.SssI was removed, and  
31 the precipitate was redispersed in 150  $\mu\text{L}$  DNA hybridization buffer. *HpaII* digestion was  
32 performed at 37  $^{\circ}\text{C}$  in the cleavage buffer containing 50 U/mL *HpaII* for 3 hours. After digestion,  
33 the AuNPs dimers were transferred into DNA hybridization buffer using centrifugation before CD  
34 measurements.

35 **Inhibition of M.SssI MTase Activity.** To study the inhibition effects of 5-Aza and procaine  
36 on the M.SssI activity, the linker DNA was incubated with MTase working buffer containing 300  
37 U/mL M.SssI, and inhibitors of various concentrations at 37  $^{\circ}\text{C}$ .

38

1 **2. Linker DNA Dependence of Chiroplasmonic Assembled AuNPs.** As shown in Figure S2, the  
2 mixture of DNA<sub>3</sub>-Au<sub>2</sub> and DNA<sub>4</sub>-Au<sub>3</sub> solution showed no CD signal. When they hybridized with  
3 linker DNA<sub>2</sub> at various concentration, the new CD peak appeared at 528 nm and it increased  
4 significantly with the increasing linker DNA<sub>2</sub> concentration. A calibration curve was constructed  
5 by plotting the variation of CD intensity with different logarithmic linker DNA<sub>2</sub> concentration  
6 (Figure S2B). The reason is that as the concentration of linker DNA<sub>2</sub> increased, so did the yields of  
7 the Au<sub>2</sub>-Au<sub>3</sub> dimers, which was proved by the statistically results from TEM data (Figures S2C).  
8 From Figure S2A, it also can be seen that the increasing Au<sub>2</sub>-Au<sub>3</sub> dimers had no observable effect  
9 on the UV-vis absorbance spectrum, which indicated that CD was significant detection signal and  
10 it provided a more sensitive detection performance. The anisotropy factor (*g*-factor) can be used as  
11 a key indicator to evaluate the detection performance regardless of the detection system.<sup>7</sup> The *g*-  
12 factor of the chiroplasmonic assemblies of AuNPs displayed values up to  $7.6 \times 10^{-3}$  (Figure S3),  
13 which was higher than other chiral nanostructures assembled by small molecules,<sup>8,9</sup> proteins,<sup>10</sup> and  
14 lipids.<sup>11</sup> The method could be used to detect linker DNA in the linear range of 0.01 ~ 2 nM, with  
15 the detection limit of 7 pM (S/N = 3). The method has good selectivity and it can differentiate the  
16 single-mismatched DNA from the fully complementary DNA. As shown in Figure 3D, the CD  
17 intensities for fully complementary linker DNA is 70.55, while it decreased to 14.61, 5.23, and  
18 2.62 in the presence of equal single-mismatched, two-mismatched, and random DNA, respectively.  
19 The sharply decreased CD value indicated that the chirality of the AuNPs dimers were strongly  
20 dependent on the sequence of linker DNA.

21

22 **3. Good Accuracy and Reproducibility of the Detection Linker DNA.** Good accuracy and  
23 reproducibility are obtained (Table S2). Various concentrations of standard linker DNA were  
24 detected with the recoveries from 90% to 102.9%, indicating the good accuracy of the method.  
25 The precision of this method was presented by the intraassay variability. Here, samples under  
26 several random dilution ratios of a fixed linker DNA<sub>2</sub> concentration were detected five times with  
27 the same batch of detection solutions. The intraassay variability (CV% = SD/mean) of 5.22%  
28 proved the good precision and reproducibility of the method. The interassay variability was tested  
29 as in the same way but using five different batches of detection solutions for each sample in  
30 different dilution ratios, respectively. The interassay variability of 7.20% suggested an acceptable  
31 variability of different batches of detection solutions.

32

33 **4. The Effects of Methylation Time on the Methylation Process.** To evaluate the effects of  
34 methylation time on the methylation process, DNA in Au<sub>2</sub>-Au<sub>3</sub> dimers were methylated for  
35 different periods in the presence of M.SssI and SAM, and then CD signal was recorded after the  
36 methylated DNA had been incubated with *Hpa*II for 3 hours. With the increment of methylation  
37 time, CD signal increased rapidly, while the increasing rate decreased gradually when the  
38 methylation time prolongs. Finally, 3 hours was chosen for the fully methylated DNA since the

1 CD signal reached a terrace at this time (Figure S5).

2

# 1 5. Supplementary Figures

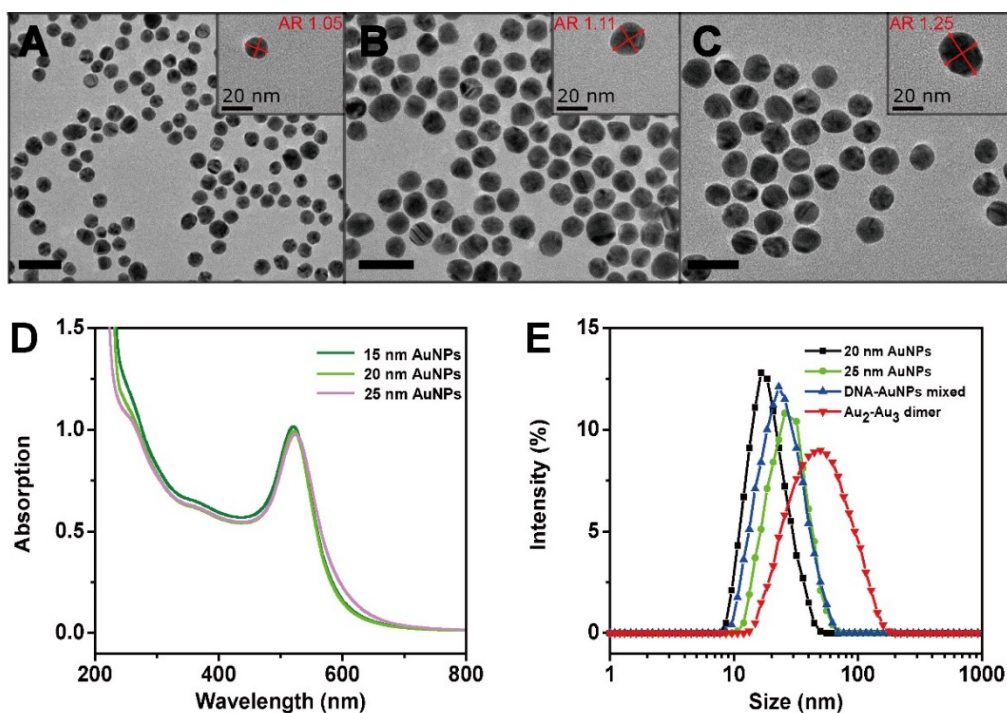

2

3

4 **Figure. S1** Representative TEM images of AuNPs of different sizes used in this project: (A)  $15 \pm$   
5  $2$  nm AuNPs; (B)  $20 \pm 2$  nm AuNPs; (C)  $25 \pm 3$  nm AuNPs. The scale bar indicates 50 nm. (D)  
6 UV/Vis spectra of AuNPs. (E) The dynamic light scattering (DLS) for NPs assemblies. The  
7 mixture stands for no hybridized of DNA<sub>3</sub>-Au<sub>2</sub> and DNA<sub>4</sub>-Au<sub>3</sub>.

8

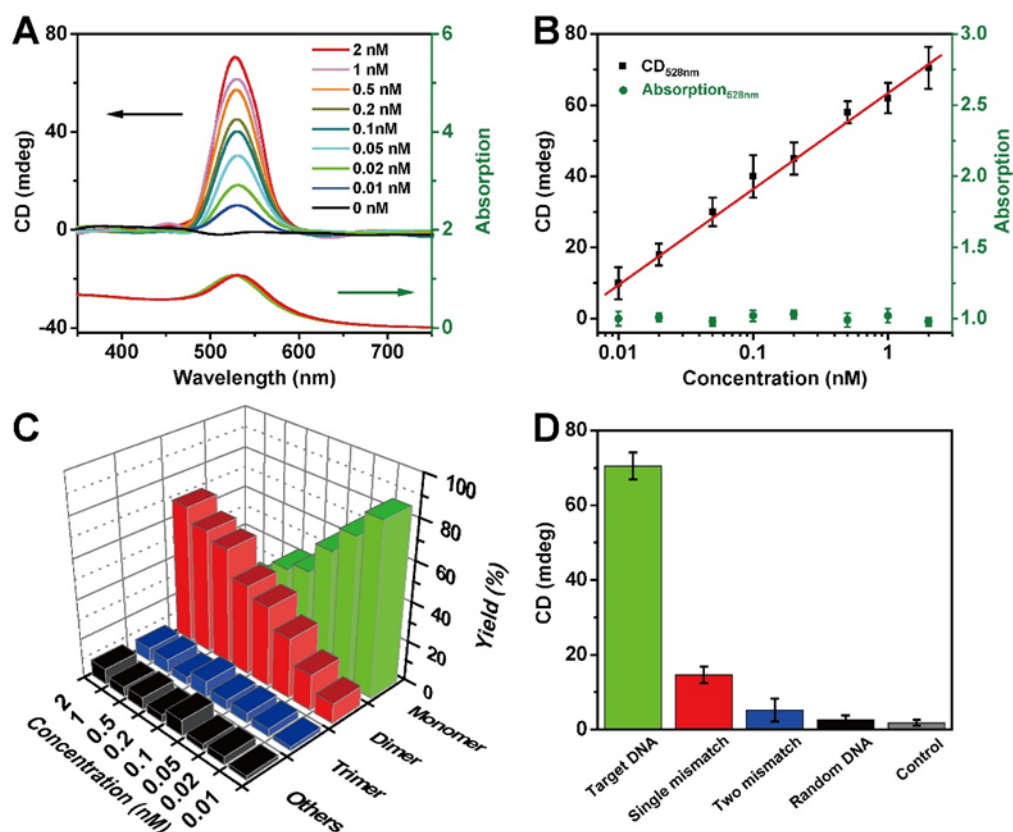

1  
2 **Figure. S2** Linker DNA dependence of chiroplasmonic assemblies of AuNPs. (A) The CD and  
3 corresponding UV-vis absorption curves with increasing concentrations of linker DNA. (B) Plot  
4 of increased CD intensity (528 nm) as a function of logarithmic linker DNA concentration. Error  
5 bars show the standard deviation of three experiments. (C) Statistical analysis of the number of  
6 AuNPs Dimers assembled at different linker DNA concentrations. (D) Selectivity of the  
7 developed CD probe for linker DNA over other DNA. The concentration of each DNA was 2 nM.  
8

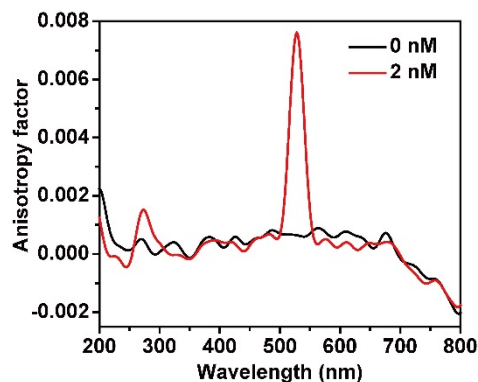

1

2 **Figure. S3** The g-factor of Au<sub>2</sub>-Au<sub>3</sub> dimers.

3 The optical activity of chiral systems is often quantified using the anisotropy factor (g-factor):

4 
$$g = \Delta \epsilon / \epsilon = \Omega \text{ (mdeg)} / (32980 \times A)$$

5 Where  $\Delta \epsilon$  and  $\epsilon$  are the molar circular dichroism and molar extinction coefficient, respectively.

6 Where  $\Omega$  (mdeg) and A are the CD band intensity (ellipticity) and the UV-vis absorption of  
 7 samples, respectively. Using the CD and the absorbance spectrum of the samples, the value of the  
 8 g-factor can be calculated.<sup>1-3</sup>

9



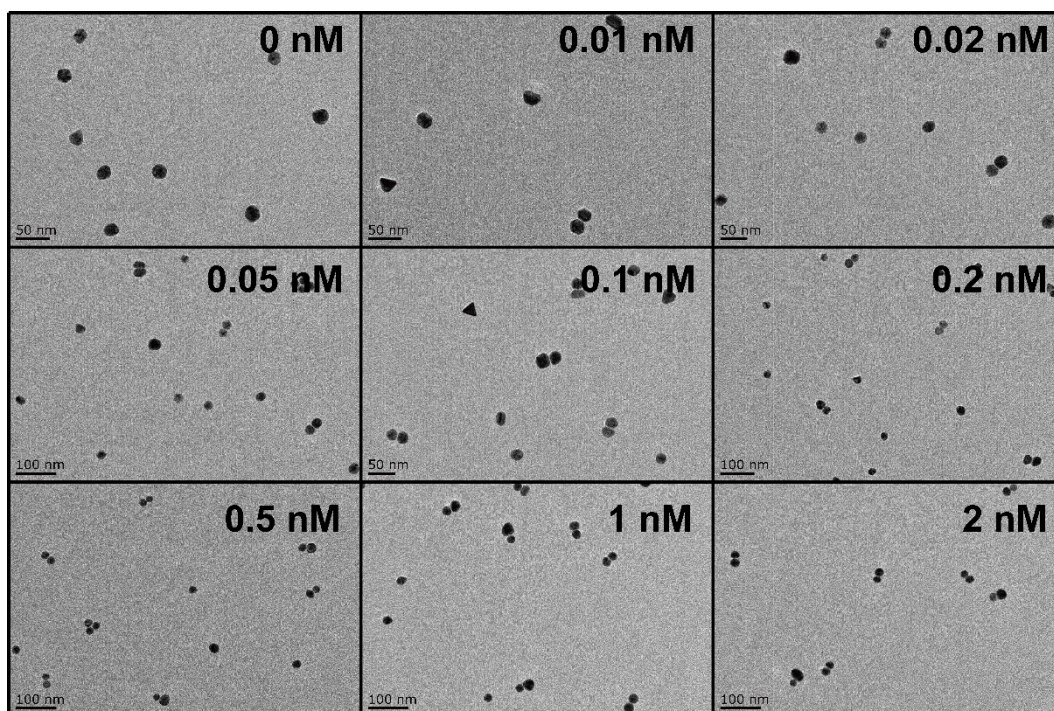

1  
2 **Figure. S4** Representative TEM images for plasmonic chiroptical sensors in the range of 0 ~ 2 nM  
3 linker DNA.  
4

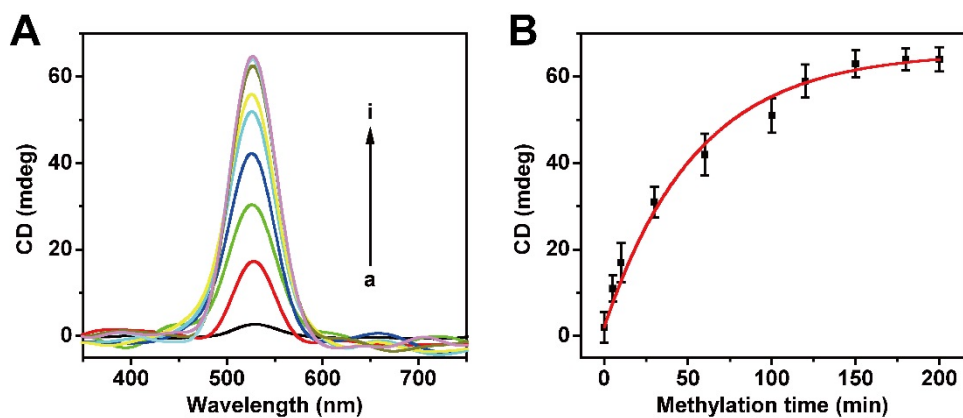

1  
2 **Figure. S5** (A) CD response of the biosensor treated with 400 U/mL M.SssI MTase with different  
3 times at (a) 0, (b) 5, (c) 10, (d) 30, (e) 60, (f) 100, (g) 120, (h) 180, and (i) 200 mins, respectively.  
4 (B) Dependence of CD signals of Au<sub>2</sub>-Au<sub>3</sub> dimers on methylation time. Error bars show the  
5 standard deviation of three experiments.  
6

**Table S1. Sequences of the Used DNA<sup>a</sup>**

| DNA name                | Sequence and modifications (from 5'-3')                                          |
|-------------------------|----------------------------------------------------------------------------------|
| DNA <sub>1</sub>        | SH-(CH <sub>2</sub> ) <sub>6</sub> -TTTTTTTTTTTT <b>CCGG</b> TCT                 |
| DNA <sub>2</sub>        | GCTTAGAGGTTTTTTTTTTT-(CH <sub>2</sub> ) <sub>6</sub> -SH                         |
| DNA <sub>3</sub>        | SH-(CH <sub>2</sub> ) <sub>6</sub> -TTTTTTTTTTGTTATGTATTT <b>CCGG</b> TCT        |
| DNA <sub>4</sub>        | GCTTAGAGGTTTGTACGTTTTTTTTTT-(CH <sub>2</sub> ) <sub>6</sub> -SH                  |
| DNA <sub>5</sub>        | SH-(CH <sub>2</sub> ) <sub>6</sub> -TTTTTTTTTTTGCTGTTGTTATGTATTT <b>CCGG</b> TCT |
| DNA <sub>6</sub>        | GCTTAGAGGTTTGTACGTTCTTTGCTTTTTTTTTTT-(CH <sub>2</sub> ) <sub>6</sub> -SH         |
| Linker DNA <sub>1</sub> | ACCTCTAAGCAGAC <b>CCGG</b> AAA                                                   |
| Linker DNA <sub>2</sub> | CGTACAAACCTCTAAGCAGAC <b>CCGG</b> AAATACATAAC                                    |
| Linker DNA <sub>3</sub> | GCAAAGAACGTACAAACCTCTAAGCAGAC <b>CCGG</b> AAATACATAACAACAGC<br>A                 |
| Single mismatch         | CGTACAAACCTCTAAGCA <b><i>T</i></b> ACCGGAAATACATAAC                              |
| Two mismatch            | CGTACAAACCTCTAAGCA <b><i>TG</i></b> CCGGAAATACATAAC                              |
| Random DNA              | GATTGAGCGTGATGAATGTCACTACTTCAACTCGC                                              |

<sup>a</sup>The bold font of CCGG was the recognized bases by M.SssI MTase and restriction endonuclease *HpaII*.

The bold/italic font of T and TG were the mismatched base.

**Table S2. Intra- and Interassay Variability of This Method**

| Added | intraassay                   |          |          | interassay                   |          |          |
|-------|------------------------------|----------|----------|------------------------------|----------|----------|
|       | Found                        | Recovery | CV       | Found                        | Recovery | CV       |
| (nM)  | (nM)                         | (%)      | (%, n=5) | (nM)                         | (%)      | (%, n=5) |
| 0.03  | 0.028                        | 93.3     | 4.87     | 0.027                        | 90.0     | 6.71     |
| 0.06  | 0.057                        | 95.0     | 5.12     | 0.062                        | 103.3    | 6.85     |
| 0.09  | 0.088                        | 97.8     | 4.91     | 0.092                        | 102.2    | 7.11     |
| 0.30  | 0.291                        | 97.0     | 5.07     | 0.289                        | 96.3     | 6.94     |
| 0.60  | 0.612                        | 102.0    | 5.35     | 0.587                        | 97.8     | 7.69     |
| 0.90  | 0.917                        | 101.9    | 5.97     | 0.881                        | 97.9     | 7.89     |
|       | intraassay variability 5.22% |          |          | interassay variability 7.20% |          |          |

1

**Table S3. Comparison of the Analytical Performance for the Detection of DNA Methyltransferase Activity by the As-proposed Method and Those Reported in the Literature**

| Strategy                                        | Detection method   | Detection limit<br>(U mL <sup>-1</sup> ) | Linear range<br>(U mL <sup>-1</sup> ) | Reference |
|-------------------------------------------------|--------------------|------------------------------------------|---------------------------------------|-----------|
| RCA                                             | Chemiluminescence  | 0.52                                     | 1–10                                  | 12        |
| Enzymatic amplification                         | DPV                | 0.04                                     | 0.1–20                                | 13        |
| HRP mimicking DNzyme                            | Colorimetry        | 6                                        | 6–100                                 | 14        |
| Methylation-resistant endonuclease              | Fluorescence       | 0.16                                     | 1–100                                 | 15        |
| HRP-IgG conjugated immunoassay                  | DPV                | 0.1                                      | 0.5–50                                | 16        |
| DNA-functionalized AuNPs amplification          | DPV                | 0.12                                     | 0.2–10                                | 17        |
| AuNPs coupled with enzyme-linkage reactions     | Colorimetry        | 0.3                                      | 1–10                                  | 18        |
| GO combining with restriction endonuclease      | DPV                | 0.05                                     | 0.1–450                               | 19        |
| Nicking enzymeassisted signal amplification     | Fluorescence       | 0.06                                     | 0.1–4                                 | 20        |
| Chiroplasmonic assemblies of gold nanoparticles | Circular dichroism | 0.27                                     | 0.5–150                               | This work |

1

## 1 6. References

- 2 1 G. Frens, *Nat. Phys. Sci.*, 1973, **241**, 20–22.
- 3 2 W. Haiss, N. T. K. Thanh, J. Aveyard and D. G. Fernig, *Anal. Chem.*, 2007, **79**, 4215–4221.
- 4 3 C. J. Loweth, W. B. Caldwell, X. G. Peng, A. P. Alivisatos and P. G. Schultz, *Angew. Chem., Int.*  
5 *Ed.*, 1999, **38**, 1808–1812.
- 6 4 S. A. Claridge, H. Y. W. Liang, S. R. Basu, J. M. J. Frechet and A. P. Alivisatos, *Nano Lett.*,  
7 2008, **8**, 1202–1206.
- 8 5 M. P. Busson, B. Rolly, B. Stout, N. Bonod, E. Larquet, A. Polman and S. Bidault, *Nano Lett.*,  
9 2011, **11**, 5060–5065.
- 10 6 B. M. Reinhard, S. Sheikholeslami, A. Mastroianni, A. P. Alivisatos and J. Liphardt, *Proc. Natl.*  
11 *Acad. Sci. U.S.A.*, 2007, **104**, 2667–2672.
- 12 7 X. L. Wu, L. G. Xu, L. Q. Liu, W. Ma, H. H. Yin, H. Kuang, L. B. Wang, C. L. Xu and N. A.  
13 Kotov, *J. Am. Chem. Soc.*, 2013, **135**, 18629–18636.
- 14 8 I. Dolamic, S. Knoppe, A. Dass and T. Burgi, *Nat. Commun.*, 2012, **3**, 798.
- 15 9 C. Gautier and T. Burgi, *J. Am. Chem. Soc.*, 2006, **128**, 11079–11087.
- 16 10 J. M. Slocik, A. O. Govorov and R. R. Naik, *Nano Lett.*, 2011, **11**, 701–705.
- 17 11 R. Y. Wang, H. L. Wang, X. C. Wu, Y. L. Ji, P. Wang, Y. Qu and T. S. Chung, *Soft Matter*,  
18 2011, **7**, 8370–8375.
- 19 12 S. Bi, T. T. Zhao, B. Y. Luo and J. J. Zhu, *Chem. Commun.*, 2013, **49**, 6906–6908.
- 20 13 H. W. Wu, S. C. Liu, J. H. Jiang, G. L. Shen and R. Q. Yu, *Chem. Commun.*, 2012, **48**,  
21 6280–6282.
- 22 14 W. Li, Z. L. Liu, H. Lin, Z. Nie, J. H. Chen, X. H. Xu and S. Z. Yao, *Anal. Chem.*, 2010, **82**,  
23 1935–1941.
- 24 15 Q. H. Quach and B. H. Chung, *Analyst*, 2014, **139**, 2674–2677.
- 25 16 M. Wang, Z. N. Xu, L. J. Chen, H. S. Yin and S. Y. Ai, *Anal. Chem.*, 2012, **84**, 9072–9078.
- 26 17 X. X. He, J. Su, Y. H. Wang, K. M. Wang, X. Q. Ni and Z. F. Chen, *Biosens. Bioelectron.*,  
27 2011, **28**, 298–303.
- 28 18 T. Liu, J. Zhao, D. M. Zhang, G. X. Li, *Anal. Chem.*, 2010, **82**, 229–233.
- 29 19 W. Li, P. Wu, H. Zhang, C. X. Cai, *Anal. Chem.*, 2012, **84**, 7583–7590.
- 30 20 Y. X. Zhao, F. Chen, Y. Y. Wu, Y. H. Dong, C. H. Fan, *Biosens. Bioelectron.*, 2013, **42**, 56–61.
